# Supplementary material
Source: PubMed Central journal article supplement (PMC2731792)
Supplement: NIHMS75387-supplement-sup__1.pdf [file NIHMS75387-supplement-sup__1.pdf]

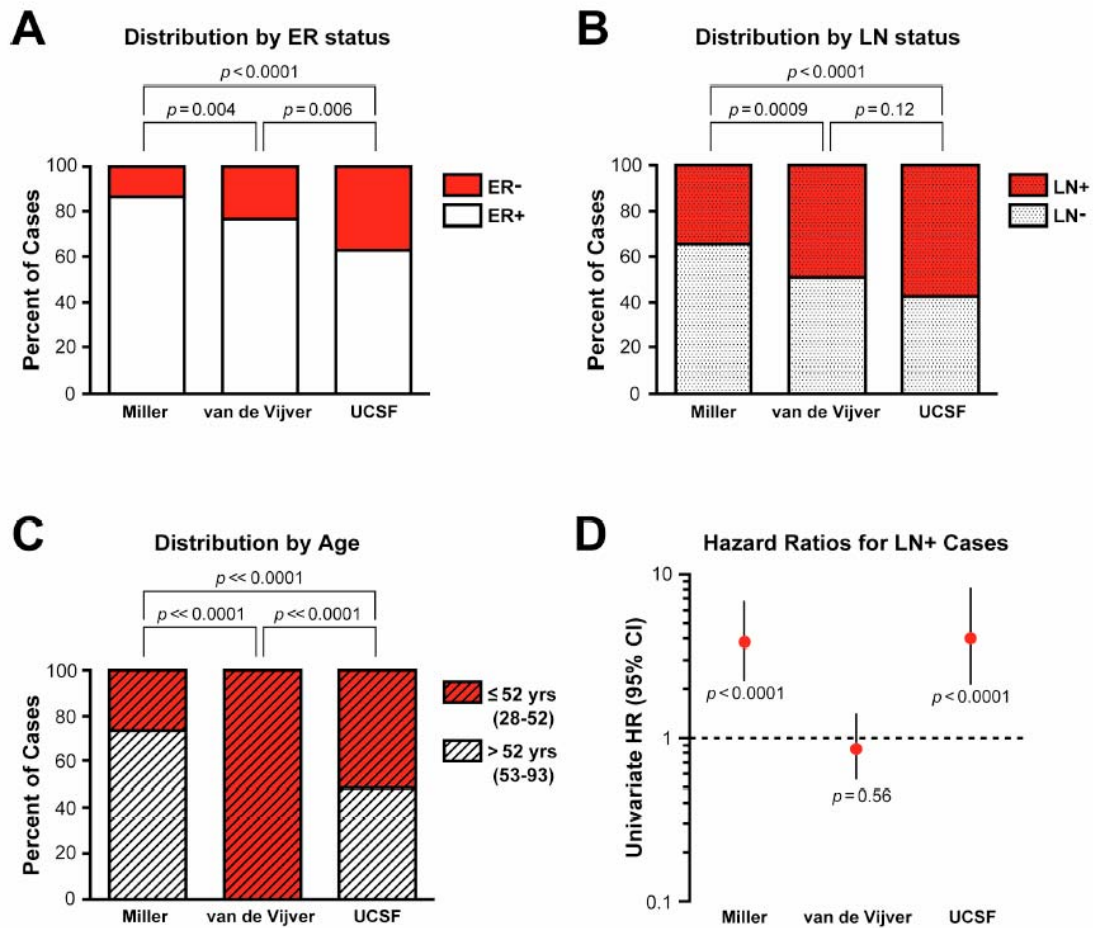

**Supplementary Figure S1.** Demographic and prognostic differences between the Miller, van de Vijver and UCSF cohorts. The three cohorts had significant differences in their (A) ER status, (B) LN status and (C) age distributions as well as in the prognostic power of LN status (D). Chi-square (A-C) and univariate Cox regression p-values (D) are provided as well as 95% confidence intervals (95%CI, whiskers in D) for the respective hazard ratios (HR).
