# Supplementary material
Source: PubMed Central journal article supplement (PMC2731792)
Supplement: NIHMS75387-supplement-sup__2.pdf [file NIHMS75387-supplement-sup__2.pdf]

**Table S1. Circulating PAII levels as a function of the PAII 4G/5G genotype.** Genotype-specific mean or median (†) plasma PAII concentrations (ng/ml) or activities (U/ml) are shown by reference (Ref.). Values for 4G or 5G carriers are offset between corresponding genotypes. Cohorts highlighted in dark gray exhibited a significant allelic dose response, with 4G homozygotes having the highest PAII expression or activity. Cohorts highlighted in light gray exhibited a similar, non-significant dose-dependent trend. CAD, coronary artery disease; NA, data not available; ns, non-significant; † median values (otherwise, mean values are shown); ¶ multiple repeated measures were provided in graphical form in the indicated reference.

| Ref. | Subjects                                   | 5G5G | 4G5G | 4G4G | units   | <i>p</i> |
|------|--------------------------------------------|------|------|------|---------|----------|
| (1)  | 1328 Framingham Heart Study participants   | 20.0 | 22.3 | 24.2 | ng/ml   | <0.0001  |
| (2)  | 127 Polish asthma patients                 | 43.7 | 40.4 | 57.4 | ng/ml   | 0.007    |
|      | 89 Polish controls                         | 19.3 | 27.3 | 29.3 | ng/ml   | 0.003    |
| (3)  | 165 British male relatives of men with CAD | 7.4  | 11.2 | 11.0 | ng/ml † | 0.079    |
|      | 165 British men, no CAD in near relatives  | 5.9  | 7.6  | 10.6 | ng/ml † | 0.065    |
| (4)  | 329 Swedish stroke cases and controls      | 33.3 | 37.0 | 40.3 | ng/ml   | 0.038    |
| (5)  | 117 Dutch stroke patients                  | 22.7 | 21.5 | 25.3 | ng/ml   | ns       |
|      | 120 Dutch controls                         | 20.3 | 25.6 | 28.3 | ng/ml   | ns       |
| (6)  | 88 Japanese renal transplant recipients    | 18.0 | 24.0 | 38.5 | ng/ml † | 0.01     |
| (7)  | 156 healthy Japanese men                   | 19.2 | 18.4 | 18.9 | ng/ml   | ns       |
| (8)  | 168 pairs of German twins                  | 66.9 | 63.8 | 77.5 | ng/ml † | ns       |
| (9)  | 43 healthy Italian Caucasians              | 8.9  | 15.6 |      | ng/ml   | ns       |
| (10) | 46 hypertensive Spanish subjects           | 26.6 | 29.6 | 51.0 | ng/ml   | <0.05    |
|      | 76 Spanish controls                        | 31.5 | 30.9 | 28.3 | ng/ml   | ns       |
| (11) | 547 German type 2 diabetics                | 1.8  | 1.9  | 2.1  | U/ml    | ns       |
| (12) | 98 Greek women with polycystic ovaries     | 45.8 | 63.2 | 98.8 | ng/ml   | <0.001   |
|      | 64 healthy Greek women                     | 27.0 | 64.7 | 83.0 | ng/ml   | <0.001   |
| (13) | 1564 US subjects, 3 ethnic groups          | 22.2 | 26.7 | 28.1 | ng/ml   | <0.005   |
| (14) | 629 elderly Dutch subjects                 | 1.4  | 2.2  | 2.2  | U/ml †  | <0.05    |
| (15) | 30 complicated Slovene pregnancy cases     | 6.5  | 10.3 | 12.4 | ng/ml † | ns       |
|      | 53 uncomplicated pregnancy controls        | 4.8  | 6.0  | 10.9 | ng/ml † | ns       |
| (16) | 57 British CAD patients                    | 27.9 | 29.6 | 30.2 | ng/ml   | ns       |
|      |                                            | 10.7 | 7.0  | 18.3 | U/ml    | ns       |
| (17) | 112 Italian retinal vein occlusion cases   | 6.5  | 8    | 13   | U/ml †  | <0.01    |
|      | 112 Italian controls                       | 7    | 8.5  | 10   | U/ml †  | 0.083    |
| (18) | 111 Italian coronary bypass patients       | NA   | <    | NA   | ng/ml ¶ | 0.008    |
|      |                                            | NA   | <    | NA   | U/ml ¶  | <0.001   |
| (19) | 146 Dutch subjects, sampled before noon    | 59   | 62   | 79   | ng/ml   | <0.01    |
|      | 117 Dutch subjects, sampled after noon     | 40   | 41   | 40   | ng/ml   | ns       |
| (20) | 29 Spanish children with renal transplants | 19.5 | 21.6 | 28.2 | U/ml    | ns       |
| (21) | 778 Swedish male CAD patients              | 13.5 | 15.0 | 18.0 | U/ml †  | 0.02     |
|      | 984 Swedish male controls                  | 11.5 | 12.5 | 12.0 | U/ml †  | ns       |
| (21) | 324 Swedish female CAD patients            | 17.5 | 17.0 | 17.0 | U/ml †  | ns       |
|      | 454 Swedish female controls                | 9.0  | 12.0 | 13.0 | U/ml †  | ns       |
| (22) | 305 Chinese men                            | 28.6 | 32.7 | 31.3 | ng/ml   | ns       |
|      |                                            | 14.3 | 16.1 | 17.2 | U/ml    | ns       |
| (22) | 260 Chinese women                          | 28.5 | 26.4 | 32.4 | ng/ml   | <0.05    |
|      |                                            | 14.8 | 15.0 | 18.1 | U/ml    | <0.05    |

**Table S1. Circulating plasma PAII levels (continued).**

| Ref. | Subjects                                     | 5G5G | 4G5G | 4G4G | units   | <i>p</i> |
|------|----------------------------------------------|------|------|------|---------|----------|
| (23) | 483 European men with CAD                    | 29   | 32   | 37   | ng/ml   | 0.03     |
|      | 507 European controls                        | 21.5 | 23   | 24   | ng/ml   | ns       |
| (24) | 19 healthy US women                          | 6.1  | 10.4 | 25.7 | ng/ml † | 0.001    |
| (25) | 537 adults from 89 North European families   | 13.1 | 14.6 | 18.9 | ng/ml   | <0.01    |
| (26) | 101 South Asian stroke patients              | 10.5 | 11.0 | 19.3 | ng/ml   | 0.01     |
|      |                                              | 13.2 | 15.1 | 18.4 | U/ml    | ns       |
|      | 102 South Asian controls                     | 13.3 | 13.0 | 16.0 | ng/ml   | ns       |
|      |                                              | 20.0 | 16.6 | 22.1 | U/ml    | ns       |
| (27) | 76 hypertensive US subjects on high salt     | 17.9 | 19.2 | 27.8 | ng/ml   | 0.001    |
|      | 76 hypertensive US subjects on low salt      | 19.2 | 21.6 | 38.9 | ng/ml   | 0.001    |
| (28) | 598 elderly Dutch subjects                   | 1.4  | 2.2  | 2.1  | U/ml †  | ns       |
| (29) | 97 Austrian sudden cardiac death survivors   | 106  | 132  | 173  | ng/ml   | <0.001   |
|      | 113 Austrian CAD patients                    | 62   | 118  | 144  | ng/ml   | <0.001   |
| (30) | 102 obese Spanish children                   | 27   | 28   | 29   | ng/ml   | ns       |
|      |                                              | 22   | 23   | 23   | U/ml    | ns       |
| (31) | 61 British severe trauma patients            | 41.1 | 36.4 | 69.2 | ng/ml ¶ | <0.05    |
| (32) | 93 obese Italian subjects                    | 18   | 35   | 50   | ng/ml   | <0.001   |
|      | 79 lean Italian subjects                     | 12   | 11   | 10   | ng/ml   | ns       |
| (33) | 87 Chinese CAD patients                      | NA   | <    | NA   |         | <0.05    |
| (34) | 96 Chinese cerebrovascular disease cases     | NA   | < NA | < NA |         | <0.05    |
| (35) | 198 German children with ischemic stroke     | 12.1 | 12.8 | 11.2 | U/ml †  | ns       |
|      | 951 healthy German Caucasian children        | 6.7  | 5.0  | 8.7  | U/ml †  | ns       |
| (36) | 89 healthy Swedish subjects                  | 14   | 17   | 20   | U/ml †  | ns       |
| (37) | 198 Dutch diabetics with nephropathy         | 65   |      | 79   | ng/ml † | 0.05     |
| (38) | 190 Spanish patients with thrombosis         | 18   | 27   | 34   | ng/ml   | <0.01    |
|      |                                              | 13   | 19   | 24   | U/ml    | <0.01    |
| (39) | 41 Spanish women with CAD                    | 25   | 39   | 50   | ng/ml   | <0.001   |
|      |                                              | 15   | 28   | 36   | U/ml    | <0.01    |
| (40) | 186 healthy US children                      | 13.2 | 15.0 | 17.1 | ng/ml   | <0.01    |
|      |                                              | 12.5 | 12.2 | 15.6 | U/ml    | ns       |
| (40) | 40 healthy US adults                         | 11.1 | 9.0  | 14.0 | ng/ml   | ns       |
|      |                                              | 5.8  | 7.0  | 10.2 | U/ml    | ns       |
| (41) | 294 healthy Dutch subjects                   | 14.5 | 16.9 | 15.0 | ng/ml   | ns       |
| (42) | 132 healthy Finnish subjects                 | 16.1 | 14.8 | 17.6 | U/ml    | ns       |
| (43) | 123 British & Dutch children with meningitis | 467  | 374  | 1051 | ng/ml † | 0.03     |
|      | 93 children with meningococcal sepsis        | 470  | 628  | 1487 | ng/ml † | 0.03     |
| (44) | 25 pairs of young Italian twins              | 15.6 | 12.1 | 14.0 | ng/ml   | ns       |
| (45) | 240 Chinese hypertensive subjects            | NA   | < NA | < NA |         | <0.05    |
| (46) | 858 French Caucasians                        | 12.5 | 16.1 | 16.7 | ng/ml   | <0.0001  |
|      |                                              | 7.5  | 9.5  | 9.5  | U/ml    | <0.005   |
| (47) | 158 Slovenes with thrombosis                 | 5.2  | 13.3 | 14.6 | U/ml †  | 0.006    |
|      | 145 healthy Slovene controls                 | 7.1  | 5.3  | 7.1  | U/ml †  | ns       |
| (48) | 218 Italian Caucasians                       | 22.4 | 26.2 | 21.8 | ng/ml   | ns       |
|      |                                              | 8.5  | 10.9 | 11.9 | U/ml    | 0.003    |

**Table S1. Circulating plasma PAI1 levels (continued).**

| Ref. | Subjects                                    | 5G5G | 4G5G | 4G4G | units  | <i>p</i> |
|------|---------------------------------------------|------|------|------|--------|----------|
| (49) | 78 Japanese CAD patients                    |      | NA   | <    | NA     | 0.019    |
| (50) | 1032 healthy Italian Caucasians             | 11.8 | 12.6 | 14.1 | ng/ml  | 0.007    |
| (51) | 1189 healthy southern Italians              | 14.2 | 15.7 | 18.0 | ng/ml  | <0.001   |
| (52) | 245 French and Irish subjects               | 14.3 | 15.0 | 14.1 | U/ml   | ns       |
| (53) | 208 Italian subjects                        | 26.2 | 30.4 | 33.7 | ng/ml  | 0.015    |
| (54) | 434 British Caucasian CAD patients          | 15.8 | 21.5 | 22.5 | ng/ml  | 0.02     |
| (55) | 37 healthy Swedish subjects, plasma         | 8.9  | 6.7  | 15.6 | ng/ml  | ns       |
|      |                                             | 7.8  | 5.3  | 18.7 | U/ml   | ns       |
|      | 37 healthy Swedish subjects, platelets      | 14.9 | 18.3 | 22.8 | U/ml   | <0.01    |
| (56) | 81 Austrians with deep vein thrombosis      | 2.0  | 9.8  | 13.3 | U/ml   | <0.05    |
|      | 49 healthy Austrian controls                | 10.9 | 9.6  | 10.0 | U/ml   | ns       |
| (57) | 146 British non-insulin dependent diabetics | 12.2 | 13.7 | 18.3 | U/ml   | 0.016    |
| (58) | 476 French and Irish CAD patients           | 12.1 | 12.2 | 14.2 | U/ml † | <0.005   |
|      | 601 healthy French and Irish controls       | 12.3 | 12.6 | 15.0 | U/ml † | <0.005   |
| (59) | 100 healthy Swedish subjects                | 6.5  | 11.5 | 15   | U/ml † | 0.037    |
| (60) | 95 Swedish CAD patients                     | 15.1 | 17.8 | 19.6 | ng/ml  | ns       |
|      | 68 healthy Swedish controls                 | 13.8 | 13.5 | 15.3 | ng/ml  | ns       |

**Table S1 References**

- Kathiresan, S., Gabriel, S. B., Yang, Q., Lochner, A. L., Larson, M. G., Levy, D., Tofler, G. H., Hirschhorn, J. N., and O'Donnell, C. J. Comprehensive survey of common genetic variation at the plasminogen activator inhibitor-1 locus and relations to circulating plasminogen activator inhibitor-1 levels. *Circulation*, *112*: 1728-1735, 2005.
- Pampuch, A., Kowal, K., Bodzenta-Lukaszyk, A., Di Castelnuovo, A., Chyczewski, L., Donati, M. B., and Iacoviello, L. The -675 4G/5G plasminogen activator inhibitor-1 promoter polymorphism in house dust mite-sensitive allergic asthma patients. *Allergy*, *61*: 234-238, 2006.
- Parry, D. J., Grant, P. J., and Scott, D. J. Fibrinolytic risk factor clustering and insulin resistance in healthy male relatives of men with intermittent claudication. *Br J Surg*, *93*: 315-324, 2006.
- Wiklund, P. G., Nilsson, L., Ardnor, S. N., Eriksson, P., Johansson, L., Stegmayr, B., Hamsten, A., Holmberg, D., and Asplund, K. Plasminogen activator inhibitor-1 4G/5G polymorphism and risk of stroke: replicated findings in two nested case-control studies based on independent cohorts. *Stroke*, *36*: 1661-1665, 2005.
- van Goor, M. L., Garcia, E. G., Leebeek, F., Brouwers, G. J., Koudstaal, P., and Dippel, D. The plasminogen activator inhibitor (PAI-1) 4G/5G promoter polymorphism and PAI-1 levels in ischemic stroke. A case-control study. *Thromb Haemost*, *93*: 92-96, 2005.
- Asano, T., Takahashi, K. A., Fujioka, M., Inoue, S., Ueshima, K., Hirata, T., Okamoto, M., Satomi, Y., Nishino, H., Tanaka, T., Hirota, Y., and Kubo, T. Relationship between postrenal transplant osteonecrosis of the femoral head and gene polymorphisms related to the coagulation and fibrinolytic systems in Japanese subjects. *Transplantation*, *77*: 220-225, 2004.
- Kitamura, Y., Okumura, K., Imamura, A., Mizuno, T., Tsuzuki, M., Numaguchi, Y., Matsui, H., and Murohara, T. Association of plasminogen activator inhibitor-1 4G/5G gene polymorphism with variations in the LDL particle size in healthy Japanese men. *Clin Chim Acta*, *347*: 209-216, 2004.
- Bonfigli, A. R., Sirolla, C., Cenerelli, S., Marra, M., Boemi, M., Franceschi, C., Testa, I., Mari, D., Sacchi, E., and Testa, R. Plasminogen activator inhibitor-1 plasma level increases with age in subjects with the 4G allele at position -675 in the promoter region. *Thromb Haemost*, *92*: 1164-1165, 2004.
- Sciaccia, F. L., Ciusani, E., Silvani, A., Corsini, E., Frigerio, S., Pogliani, S., Parati, E., Croci, D., Boiardi, A., and Salmaggi, A. Genetic and plasma markers of venous thromboembolism in patients with high grade glioma. *Clin Cancer Res*, *10*: 1312-1317, 2004.
- Roncal, C., Orbe, J., Rodriguez, J. A., Belzunce, M., Beloqui, O., Diez, J., and Paramo, J. A. Influence of the 4G/5G PAI-1 genotype on angiotensin II-stimulated human endothelial cells and in patients with hypertension. *Cardiovasc Res*, *63*: 176-185, 2004.

11. Zietz, B., Buechler, C., Drobnik, W., Herfarth, H., Scholmerich, J., and Schaffler, A. Allelic frequency of the PAI-1 4G/5G promoter polymorphism in patients with type 2 diabetes mellitus and lack of association with PAI-1 plasma levels. *Endocr Res*, *30*: 443-453, 2004.
12. Diamanti-Kandarakis, E., Palioniko, G., Alexandraki, K., Bergiele, A., Koutsouba, T., and Bartzis, M. The prevalence of 4G/5G polymorphism of plasminogen activator inhibitor-1 (PAI-1) gene in polycystic ovarian syndrome and its association with plasma PAI-1 levels. *Eur J Endocrinol*, *150*: 793-798, 2004.
13. Festa, A., D'Agostino, R., Jr., Rich, S. S., Jenny, N. S., Tracy, R. P., and Haffner, S. M. Promoter (4G/5G) plasminogen activator inhibitor-1 genotype and plasminogen activator inhibitor-1 levels in blacks, Hispanics, and non-Hispanic whites: the Insulin Resistance Atherosclerosis Study. *Circulation*, *107*: 2422-2427, 2003.
14. Hoekstra, T., Geleijnse, J. M., Kluft, C., Giltay, E. J., Kok, F. J., and Schouten, E. G. 4G/4G genotype of PAI-1 gene is associated with reduced risk of stroke in elderly. *Stroke*, *34*: 2822-2828, 2003.
15. Meglic, L., Stegnar, M., Milanez, T., Bozic, M., Peterlin, B., Peternel, P., and Novak-Antolic, Z. Factor V Leiden, prothrombin 20210G --> A, methylenetetrahydrofolate reductase 677C --> T and plasminogen activator inhibitor 4G/5G polymorphism in women with pregnancy-related venous thromboembolism. *Eur J Obstet Gynecol Reprod Biol*, *111*: 157-163, 2003.
16. Panahloo, A., Mohamed-Ali, V., Gray, R. P., Humphries, S. E., and Yudkin, J. S. Plasminogen activator inhibitor-1 (PAI-1) activity post myocardial infarction: the role of acute phase reactants, insulin-like molecules and promoter (4G/5G) polymorphism in the PAI-1 gene. *Atherosclerosis*, *168*: 297-304, 2003.
17. Gori, A. M., Marcucci, R., Fatini, C., Gensini, F., Sticchi, E., Sodi, A., Cappelli, S., Menchini, U., Gensini, G. F., Abbate, R., and Prisco, D. Impaired fibrinolysis in retinal vein occlusion: a role for genetic determinants of PAI-1 levels. *Thromb Haemost*, *92*: 54-60, 2004.
18. Burzotta, F., Iacoviello, L., Di Castelnuovo, A., Zamparelli, R., D'Orazio, A., Amore, C., Schiavello, R., Donati, M. B., Maseri, A., Possati, G., and Andreotti, F. 4G/5G PAI-1 promoter polymorphism and acute-phase levels of PAI-1 following coronary bypass surgery: a prospective study. *J Thromb Thrombolysis*, *16*: 149-154, 2003.
19. van der Bom, J. G., Bots, M. L., Haverkate, F., Kluft, C., and Grobbee, D. E. The 4G/5G polymorphism in the gene for PAI-1 and the circadian oscillation of plasma PAI-1. *Blood*, *101*: 1841-1844, 2003.
20. Aldamiz-Echevarria, L., Sanjurjo, P., Vallo, A., Aguirre, M., Perez-Nanclares, G., Gimeno, P., Rueda, M., Ruiz, J. I., and Rodriguez-Soriano, J. Genetic and metabolic determinants of increased plasma plasminogen activator inhibitor-1 activity in children with renal transplants. *Pediatr Nephrol*, *18*: 749-755, 2003.
21. Leander, K., Wiman, B., Hallqvist, J., Sten-Linder, M., and de Faire, U. PAI-1 level and the PAI-1 4G/5G polymorphism in relation to risk of non-fatal myocardial infarction: results from the Stockholm Heart Epidemiology Program (SHEEP). *Thromb Haemost*, *89*: 1064-1071, 2003.
22. Jeng, J. R. Association of PAI-1 gene promoter 4g/5g polymorphism with plasma PAI-1 activity in Chinese patients with and without hypertension. *Am J Hypertens*, *16*: 290-296, 2003.
23. Juhan-Vague, I., Morange, P. E., Frere, C., Aillaud, M. F., Alessi, M. C., Hawe, E., Boquist, S., Tornvall, P., Yudkin, J. S., Tremoli, E., Margaglione, M., Di Minno, G., Hamsten, A., and Humphries, S. E. The plasminogen activator inhibitor-1 -675 4G/5G genotype influences the risk of myocardial infarction associated with elevated plasma proinsulin and insulin concentrations in men from Europe: the HIFMECH study. *J Thromb Haemost*, *1*: 2322-2329, 2003.
24. Brown, N. J., Abbas, A., Byrne, D., Schoenhard, J. A., and Vaughan, D. E. Comparative effects of estrogen and angiotensin-converting enzyme inhibition on plasminogen activator inhibitor-1 in healthy postmenopausal women. *Circulation*, *105*: 304-309, 2002.
25. Freeman, M. S., Mansfield, M. W., Barrett, J. H., and Grant, P. J. Genetic contribution to circulating levels of hemostatic factors in healthy families with effects of known genetic polymorphisms on heritability. *Arterioscler Thromb Vasc Biol*, *22*: 506-510, 2002.
26. Kain, K., Young, J., Bamford, J., Bavington, J., Grant, P. J., and Catto, A. J. Determinants of plasminogen activator inhibitor-1 in South Asians with ischaemic stroke. *Cerebrovasc Dis*, *14*: 77-83, 2002.
27. Brown, N. J., Murphey, L. J., Srikuma, N., Koschachuhanan, N., Williams, G. H., and Vaughan, D. E. Interactive effect of PAI-1 4G/5G genotype and salt intake on PAI-1 antigen. *Arterioscler Thromb Vasc Biol*, *21*: 1071-1077, 2001.

28. Hoekstra, T., Geleijnse, J. M., Schouten, E. G., and Klufft, C. Diurnal variation in PAI-1 activity predominantly confined to the 4G-allele of the PAI-1 gene. *Thromb Haemost*, 88: 794-798, 2002.
29. Anvari, A., Schuster, E., Gottsauner-Wolf, M., Wojta, J., and Huber, K. PAI-1 4G/5G polymorphism and sudden cardiac death in patients with coronary artery disease. *Thromb Res*, 103: 103-107, 2001.
30. Estelles, A., Dalmau, J., Falco, C., Berbel, O., Castello, R., Espana, F., and Aznar, J. Plasma PAI-1 levels in obese children--effect of weight loss and influence of PAI-1 promoter 4G/5G genotype. *Thromb Haemost*, 86: 647-652, 2001.
31. Menges, T., Hermans, P. W., Little, S. G., Langefeld, T., Boning, O., Engel, J., Sluijter, M., de Groot, R., and Hempelmann, G. Plasminogen-activator-inhibitor-1 4G/5G promoter polymorphism and prognosis of severely injured patients. *Lancet*, 357: 1096-1097, 2001.
32. Sartori, M. T., Vettor, R., De Pergola, G., De Mitrio, V., Saggiorato, G., Della Mea, P., Patrassi, G. M., Lombardi, A. M., Fabris, R., and Girolami, A. Role of the 4G/5G polymorphism of PaI-1 gene promoter on PaI-1 levels in obese patients: influence of fat distribution and insulin-resistance. *Thromb Haemost*, 86: 1161-1169, 2001.
33. Fu, L., Jin, H., Song, K., Zhang, C., Shen, J., and Huang, Y. Relationship between gene polymorphism of the PAI-1 promoter and myocardial infarction. *Chin Med J (Engl)*, 114: 266-269, 2001.
34. Zhang, C., Li, J., Li, L., and Luo, B. [The study of PAI-1 promoter region gene polymorphism in cerebrovascular disease]. *Zhonghua Yi Xue Yi Chuan Xue Za Zhi*, 18: 383-387, 2001.
35. Nowak-Gottl, U., Strater, R., Kosch, A., von Eckardstein, A., Schobess, R., Luigs, P., Nabel, P., Vielhaber, H., Kurnik, K., and Junker, R. The plasminogen activator inhibitor (PAI)-1 promoter 4G/4G genotype is not associated with ischemic stroke in a population of German children. Childhood Stroke Study Group. *Eur J Haematol*, 66: 57-62, 2001.
36. van Harmelen, V., Wahrenberg, H., Eriksson, P., and Arner, P. Role of gender and genetic variance in plasminogen activator inhibitor-1 secretion from human adipose tissue. *Thromb Haemost*, 83: 304-308, 2000.
37. Tarnow, L., Stehouwer, C. D., Emeis, J. J., Poirier, O., Cambien, F., Hansen, B. V., and Parving, H. H. Plasminogen activator inhibitor-1 and apolipoprotein E gene polymorphisms and diabetic angiopathy. *Nephrol Dial Transplant*, 15: 625-630, 2000.
38. Segui, R., Estelles, A., Mira, Y., Espana, F., Villa, P., Falco, C., Vaya, A., Grancha, S., Ferrando, F., and Aznar, J. PAI-1 promoter 4G/5G genotype as an additional risk factor for venous thrombosis in subjects with genetic thrombophilic defects. *Br J Haematol*, 111: 122-128, 2000.
39. Grancha, S., Estelles, A., Tormo, G., Falco, C., Gilabert, J., Espana, F., Cano, A., Segui, R., and Aznar, J. Plasminogen activator inhibitor-1 (PAI-1) promoter 4G/5G genotype and increased PAI-1 circulating levels in postmenopausal women with coronary artery disease. *Thromb Haemost*, 81: 516-521, 1999.
40. Balasa, V. V., Gruppo, R. A., Glueck, C. J., Stroop, D., Becker, A., Pillow, A., and Wang, P. The relationship of mutations in the MTHFR, prothrombin, and PAI-1 genes to plasma levels of homocysteine, prothrombin, and PAI-1 in children and adults. *Thromb Haemost*, 81: 739-744, 1999.
41. Doggen, C. J., Bertina, R. M., Cats, V. M., Reitsma, P. H., and Rosendaal, F. R. The 4G/5G polymorphism in the plasminogen activator inhibitor-1 gene is not associated with myocardial infarction. *Thromb Haemost*, 82: 115-120, 1999.
42. Vaisanen, S. B., Humphries, S. E., Luong, L. A., Penttila, I., Bouchard, C., and Rauramaa, R. Regular exercise, plasminogen activator inhibitor-1 (PAI-1) activity and the 4G/5G promoter polymorphism in the PAI-1 gene. *Thromb Haemost*, 82: 1117-1120, 1999.
43. Hermans, P. W., Hibberd, M. L., Booy, R., Daramola, O., Hazelzet, J. A., de Groot, R., and Levin, M. 4G/5G promoter polymorphism in the plasminogen-activator-inhibitor-1 gene and outcome of meningococcal disease. Meningococcal Research Group. *Lancet*, 354: 556-560, 1999.
44. Cesari, M., Sartori, M. T., Patrassi, G. M., Vettore, S., and Rossi, G. P. Determinants of plasma levels of plasminogen activator inhibitor-1 : A study of normotensive twins. *Arterioscler Thromb Vasc Biol*, 19: 316-320, 1999.
45. Song, Y., Xu, W., Chen, Y., Che, L., Wang, Q., Zhou, X., and Wu, J. [The influences of genetic and environmental factors on plasma plasminogen activator inhibitor-1 levels in patients with essential hypertension]. *Zhonghua Yi Xue Yi Chuan Xue Za Zhi*, 16: 374-376, 1999.
46. Henry, M., Tregouet, D. A., Alessi, M. C., Aillaud, M. F., Visvikis, S., Siest, G., Tiret, L., and Juhan-Vague, I. Metabolic determinants are much more important than genetic polymorphisms in determining the PAI-1 activity and antigen plasma concentrations: a family study with part of the Stanislas Cohort. *Arterioscler Thromb Vasc Biol*, 18: 84-91, 1998.

47. Stegnar, M., Uhrin, P., Peternel, P., Mavri, A., Salobir-Pajnic, B., Stare, J., and Binder, B. R. The 4G/5G sequence polymorphism in the promoter of plasminogen activator inhibitor-1 (PAI-1) gene: relationship to plasma PAI-1 level in venous thromboembolism. *Thromb Haemost*, 79: 975-979, 1998.
48. Burzotta, F., Di Castelnuovo, A., Amore, C., D'Orazio, A., Di Bitondo, R., Donati, M. B., and Iacoviello, L. 4G/5G promoter PAI-1 gene polymorphism is associated with plasmatic PAI-1 activity in Italians: a model of gene-environment interaction. *Thromb Haemost*, 79: 354-358, 1998.
49. Iwai, N., Shimoike, H., Nakamura, Y., Tamaki, S., and Kinoshita, M. The 4G/5G polymorphism of the plasminogen activator inhibitor gene is associated with the time course of progression to acute coronary syndromes. *Atherosclerosis*, 136: 109-114, 1998.
50. Margaglione, M., Cappucci, G., d'Addetta, M., Colaizzo, D., Giuliani, N., Vecchione, G., Mascolo, G., Grandone, E., and Di Minno, G. PAI-1 plasma levels in a general population without clinical evidence of atherosclerosis: relation to environmental and genetic determinants. *Arterioscler Thromb Vasc Biol*, 18: 562-567, 1998.
51. Margaglione, M., Cappucci, G., Colaizzo, D., Giuliani, N., Vecchione, G., Grandone, E., Pennelli, O., and Di Minno, G. The PAI-1 gene locus 4G/5G polymorphism is associated with a family history of coronary artery disease. *Arterioscler Thromb Vasc Biol*, 18: 152-156, 1998.
52. Henry, M., Chomiki, N., Scarabin, P. Y., Alessi, M. C., Peiretti, F., Arveiler, D., Ferrieres, J., Evans, A., Amouyel, P., Poirier, O., Cambien, F., and Juhan-Vague, I. Five frequent polymorphisms of the PAI-1 gene: lack of association between genotypes, PAI activity, and triglyceride levels in a healthy population. *Arterioscler Thromb Vasc Biol*, 17: 851-858, 1997.
53. Margaglione, M., Grandone, E., Vecchione, G., Cappucci, G., Giuliani, N., Colaizzo, D., Celentano, E., Panico, S., and Di Minno, G. Plasminogen activator inhibitor-1 (PAI-1) antigen plasma levels in subjects attending a metabolic ward: relation to polymorphisms of PAI-1 and angiotensin converting enzyme (ACE) genes. *Arterioscler Thromb Vasc Biol*, 17: 2082-2087, 1997.
54. Ossei-Gerning, N., Mansfield, M. W., Stickland, M. H., Wilson, I. J., and Grant, P. J. Plasminogen activator inhibitor-1 promoter 4G/5G genotype and plasma levels in relation to a history of myocardial infarction in patients characterized by coronary angiography. *Arterioscler Thromb Vasc Biol*, 17: 33-37, 1997.
55. Nordenhem, A. and Wiman, B. Plasminogen activator inhibitor-1 (PAI-1) content in platelets from healthy individuals genotyped for the 4G/5G polymorphism in the PAI-1 gene. *Scand J Clin Lab Invest*, 57: 453-461, 1997.
56. Grubic, N., Stegnar, M., Peternel, P., Kaider, A., and Binder, B. R. A novel G/A and the 4G/5G polymorphism within the promoter of the plasminogen activator inhibitor-1 gene in patients with deep vein thrombosis. *Thromb Res*, 84: 431-443, 1996.
57. Panahloo, A., Mohamed-Ali, V., Lane, A., Green, F., Humphries, S. E., and Yudkin, J. S. Determinants of plasminogen activator inhibitor 1 activity in treated NIDDM and its relation to a polymorphism in the plasminogen activator inhibitor 1 gene. *Diabetes*, 44: 37-42, 1995.
58. Ye, S., Green, F. R., Scarabin, P. Y., Nicaud, V., Bara, L., Dawson, S. J., Humphries, S. E., Evans, A., Luc, G., Cambou, J. P., and et al. The 4G/5G genetic polymorphism in the promoter of the plasminogen activator inhibitor-1 (PAI-1) gene is associated with differences in plasma PAI-1 activity but not with risk of myocardial infarction in the ECTIM study. *Etude CasTemoins de l'infarctus du Myocarde*. *Thromb Haemost*, 74: 837-841, 1995.
59. Eriksson, P., Kallin, B., van 't Hooft, F. M., Bavenholm, P., and Hamsten, A. Allele-specific increase in basal transcription of the plasminogen-activator inhibitor 1 gene is associated with myocardial infarction. *Proc Natl Acad Sci U S A*, 92: 1851-1855, 1995.
60. Dawson, S., Hamsten, A., Wiman, B., Henney, A., and Humphries, S. Genetic variation at the plasminogen activator inhibitor-1 locus is associated with altered levels of plasma plasminogen activator inhibitor-1 activity. *Arterioscler Thromb*, 11: 183-190, 1991.
