# Supplementary material
Source: PubMed Central journal article supplement (PMC2731792)
Supplement: NIHMS75387-supplement-sup__3.pdf [file NIHMS75387-supplement-sup__3.pdf]

**Table S2-1. PAI1-correlated genes.** Genes whose expression was correlated with that of PAI1 at an FDR-adjusted  $p < 0.0001$  are ranked by Pearson correlation ( $r$ ) in this and the following continuation tables. Only genes that met this conservative cutoff are listed. Thus the smaller UCSF set had fewer correlated genes. The 32 genes that were correlated in all three datasets are highlighted in gray, and those that were among the top 40 correlated genes in all three datasets are shaded and linked by color.

| UCSF dataset |                  |      | van de Vijver dataset |                    |       | Miller dataset |                 |      |
|--------------|------------------|------|-----------------------|--------------------|-------|----------------|-----------------|------|
| Rank         | Symbol           | $r$  | Rank                  | Symbol             | $r$   | Rank           | Symbol          | $r$  |
| 1            | <b>CTGF</b>      | 0.68 | 1                     | <b>SLC2A3</b>      | 0.57  | 1              | <b>CTGF</b>     | 0.66 |
| 2            | <i>KLF6</i>      | 0.64 | 2                     | <b>CYR61</b>       | 0.53  | 2              | <b>SLC2A3</b>   | 0.59 |
| 3            | <i>DUSP1</i>     | 0.61 | 3                     | <i>PLAU</i>        | 0.50  | 3              | <i>ANGPTL2</i>  | 0.54 |
| 4            | <i>ANGPTL2</i>   | 0.58 | 4                     | <i>HBEGF</i>       | 0.50  | 4              | <i>CDH11</i>    | 0.53 |
| 5            | <i>MIG2</i>      | 0.58 | 5                     | <i>CNK</i>         | 0.50  | 5              | <i>EMP1</i>     | 0.53 |
| 6            | <i>EMP1</i>      | 0.58 | 6                     | <i>RGS16</i>       | 0.49  | 6              | <i>MIG2</i>     | 0.53 |
| 7            | <i>GADD45B</i>   | 0.56 | 7                     | <i>ITGA5</i>       | 0.48  | 7              | <b>CYR61</b>    | 0.52 |
| 8            | <i>SEC23A</i>    | 0.56 | 8                     | <i>TUBB6</i>       | 0.46  | 8              | <i>DOC1</i>     | 0.51 |
| 9            | <b>SLC2A3</b>    | 0.54 | 9                     | <b>CTGF</b>        | 0.45  | 9              | <i>NNMT</i>     | 0.51 |
| 10           | <i>KLF9</i>      | 0.53 | 10                    | <i>INHBA</i>       | 0.45  | 10             | <b>GREM1</b>    | 0.51 |
| 11           | <i>DOC1</i>      | 0.53 | 11                    | <i>Contig4595</i>  | 0.44  | 11             | <i>GFPT2</i>    | 0.51 |
| 12           | <i>PMX1</i>      | 0.53 | 12                    | <i>NR4A1</i>       | 0.44  | 12             | <b>LAMB1</b>    | 0.50 |
| 13           | <b>CYR61</b>     | 0.53 | 13                    | <i>PGAR</i>        | 0.43  | 13             | <i>GEM</i>      | 0.50 |
| 14           | <i>DLC1</i>      | 0.53 | 14                    | <i>SLC39A14</i>    | 0.43  | 14             | <i>TNFAIP6</i>  | 0.50 |
| 15           | <i>THBS1</i>     | 0.53 | 15                    | <i>C4ST</i>        | 0.43  | 15             | <i>KLF6</i>     | 0.49 |
| 16           | <i>GABARAPL1</i> | 0.52 | 16                    | <i>VEGFC</i>       | 0.43  | 16             | <i>SEC23A</i>   | 0.49 |
| 17           | <i>ZFP36</i>     | 0.52 | 17                    | <i>FN1</i>         | 0.43  | 17             | <i>PRRX1</i>    | 0.49 |
| 18           | <i>CALD1</i>     | 0.51 | 18                    | <i>MMP14</i>       | 0.43  | 18             | <i>NOX4</i>     | 0.48 |
| 19           | <i>ID3</i>       | 0.51 | 19                    | <i>NNMT</i>        | 0.42  | 19             | <b>CSPG2</b>    | 0.48 |
| 20           | <i>C5R1</i>      | 0.51 | 20                    | <i>GADD45B</i>     | 0.42  | 20             | <i>TIMP3</i>    | 0.48 |
| 21           | <i>SPRY1</i>     | 0.51 | 21                    | <b>GREM1</b>       | 0.42  | 21             | <b>FN1</b>      | 0.47 |
| 22           | <b>GREM1</b>     | 0.50 | 22                    | <i>CTSL</i>        | 0.42  | 22             | <b>JUNB</b>     | 0.46 |
| 23           | <i>NID</i>       | 0.50 | 23                    | <i>PLAUR</i>       | 0.42  | 23             | <i>FBN1</i>     | 0.46 |
| 24           | <i>F2R</i>       | 0.50 | 24                    | <i>ZFP36</i>       | 0.42  | 24             | <i>COL4A1</i>   | 0.46 |
| 25           | <i>FSTL1</i>     | 0.50 | 25                    | <i>IRC1</i>        | 0.41  | 25             | <i>FOXO1A</i>   | 0.46 |
| 26           | <i>SSI-3</i>     | 0.50 | 26                    | <b>ANGPT2</b>      | 0.41  | 26             | <i>NID</i>      | 0.46 |
| 27           | <i>DCN</i>       | 0.50 | 27                    | <i>Contig47297</i> | 0.40  | 27             | <i>ID3</i>      | 0.46 |
| 28           | <b>LOX</b>       | 0.49 | 28                    | <i>ADM</i>         | 0.40  | 28             | <i>SERPINH1</i> | 0.45 |
| 29           | <i>MYO1E</i>     | 0.49 | 29                    | <i>LAMA4</i>       | 0.40  | 29             | <i>SULF1</i>    | 0.45 |
| 30           | <b>TIEG</b>      | 0.49 | 30                    | <i>Contig375</i>   | 0.40  | 30             | <b>DACT1</b>    | 0.45 |
| 31           | <i>TPM4</i>      | 0.49 | 31                    | <b>IL6</b>         | 0.40  | 31             | <i>PLS3</i>     | 0.45 |
| 32           | <i>EGR2</i>      | 0.49 | 32                    | <i>LATS2</i>       | 0.40  | 32             | <i>GPR116</i>   | 0.45 |
| 33           | <i>GAS1</i>      | 0.49 | 33                    | <i>TGFBI</i>       | 0.40  | 33             | <i>COL5A2</i>   | 0.45 |
| 34           | <i>FAP</i>       | 0.49 | 34                    | <i>NT5</i>         | 0.40  | 34             | <b>PDGFRB</b>   | 0.45 |
| 35           | <i>COL1A1</i>    | 0.49 | 35                    | <i>KIAA1199</i>    | 0.40  | 35             | <i>DLC1</i>     | 0.45 |
| 36           | <b>LAMB1</b>     | 0.49 | 36                    | <i>HMOX1</i>       | 0.39  | 36             | <i>LRRC32</i>   | 0.45 |
| 37           | <b>JUNB</b>      | 0.48 | 37                    | <i>BMP1</i>        | 0.39  | 37             | <i>TUBB6</i>    | 0.45 |
| 38           | <b>ANGPT2</b>    | 0.48 | 38                    | <i>MYO1C</i>       | 0.39  | 38             | <i>FAP</i>      | 0.45 |
| 39           | <b>FN1</b>       | 0.48 | 39                    | <i>MAP4K4</i>      | 0.39  | 39             | <i>VIM</i>      | 0.44 |
| 40           | <b>CSPG2</b>     | 0.48 | 40                    | <i>MGC14376</i>    | 0.39  | 40             | <i>CRISPLD2</i> | 0.44 |
| 41           | <i>VIM</i>       | 0.48 | 41                    | <i>ITGA1</i>       | 0.39  | 41             | <b>LOX</b>      | 0.44 |
| 42           | <i>PTRF</i>      | 0.48 | 42                    | <i>CTSB</i>        | 0.38  | 42             | <i>AKAP12</i>   | 0.44 |
| 43           | <i>SGK</i>       | 0.48 | 43                    | <i>FLJ20245</i>    | 0.38  | 43             | <i>LAMC1</i>    | 0.44 |
| 44           | <i>PLAU</i>      | 0.48 | 44                    | <i>NID2</i>        | 0.38  | 44             | <i>COMP</i>     | 0.44 |
| 45           | <i>KLF4</i>      | 0.47 | 45                    | <i>Contig2446</i>  | 0.38  | 45             | <i>COL4A2</i>   | 0.43 |
| 46           | <i>NT5E</i>      | 0.47 | 46                    | <b>ANGPTL2</b>     | 0.38  | 46             | <i>GADD45B</i>  | 0.43 |
| 47           | <i>GLT8D2</i>    | 0.47 | 47                    | <i>GADD34</i>      | 0.38  | 47             | <i>RBMS1</i>    | 0.43 |
| 48           | <i>TWIST</i>     | 0.47 | 48                    | <i>LIMS1</i>       | 0.38  | 48             | <b>TIEG</b>     | 0.43 |
| 49           | <b>DACT1</b>     | 0.46 | 49                    | <i>RAI14</i>       | 0.37  | 49             | <i>THBS2</i>    | 0.43 |
| 50           | <i>INHBA</i>     | 0.46 | 50                    | <i>GPR4</i>        | 0.37  | 50             | <b>ZFP36</b>    | 0.43 |
| 51           | <i>SDS</i>       | 0.46 | 51                    | <i>AF007150</i>    | 0.37  | 51             | <i>SFRP4</i>    | 0.43 |
| 52           | <b>ATF3</b>      | 0.46 | 52                    | <i>LOXL2</i>       | 0.37  | 52             | <i>INHBA</i>    | 0.43 |
| 53           | <i>IL6</i>       | 0.46 | 53                    | <i>HNT</i>         | 0.37  | 53             | <i>ADAMTS1</i>  | 0.42 |
| 54           | <i>CALU</i>      | 0.46 | 54                    | <i>HEG1</i>        | 0.37  | 54             | <i>CTSK</i>     | 0.42 |
| 55           | <i>TIMP3</i>     | 0.46 | 55                    | <i>ATF3</i>        | 0.37  | 55             | <b>IGFBP7</b>   | 0.42 |
| 56           | <b>IGFBP7</b>    | 0.45 | 56                    | <i>EPIM</i>        | 0.37  | 56             | <i>ZFPM2</i>    | 0.42 |
| 57           | <i>AMOTL2</i>    | 0.45 | 57                    | <i>ADAMTS7</i>     | 0.37  | 57             | <i>HSPG2</i>    | 0.42 |
| 58           | <i>DFNA5</i>     | 0.45 | 58                    | <i>SAMD4A</i>      | 0.37  | 58             | <i>IL6</i>      | 0.42 |
| 59           | <b>PDGFRB</b>    | 0.45 | 59                    | <i>Contig54290</i> | -0.37 | 59             | <i>EMLIN1</i>   | 0.42 |
| 60           | <i>PLAUR</i>     | 0.45 | 60                    | <i>Contig38866</i> | 0.37  | 60             | <b>EGR2</b>     | 0.42 |
| 61           | <i>CDH11</i>     | 0.44 | 61                    | <i>Contig44759</i> | 0.37  | 61             | <b>ANGPT2</b>   | 0.42 |
|              |                  |      | 62                    | <i>SLC16A3</i>     | 0.37  | 62             | <i>FSTL1</i>    | 0.42 |
|              |                  |      | 63                    | <i>Contig53848</i> | 0.36  | 63             | <i>FBLN2</i>    | 0.42 |
|              |                  |      | 64                    | <i>SLC1A3</i>      | 0.36  | 64             | <b>DUSP1</b>    | 0.42 |
|              |                  |      | 65                    | <i>SREC</i>        | 0.36  | 65             | <i>HBEGF</i>    | 0.41 |

**Table S2-2. PAI1-correlated genes.**

| van de Vijver dataset |               |       | Miller dataset |              |      |
|-----------------------|---------------|-------|----------------|--------------|------|
| Rank                  | Symbol        | r     | Rank           | Symbol       | r    |
| 66                    | <b>LAMB1</b>  | 0.36  | 66             | LRP1         | 0.41 |
| 67                    | COL4A2        | 0.35  | 67             | NT5E         | 0.41 |
| 68                    | PER1          | 0.35  | 68             | SERPINF1     | 0.41 |
| 69                    | ITGB1         | 0.35  | 69             | MXRA7        | 0.41 |
| 70                    | TNFSF4        | 0.35  | 70             | RGS16        | 0.41 |
| 71                    | Contig51456   | 0.35  | 71             | COL6A2       | 0.41 |
| 72                    | ADAM12        | 0.35  | 72             | MMP19        | 0.41 |
| 73                    | ETS1          | 0.35  | 73             | BGN          | 0.41 |
| 74                    | HS3ST3A1      | 0.34  | 74             | TCF8         | 0.41 |
| 75                    | LIF           | 0.34  | 75             | BAG2         | 0.41 |
| 76                    | DAF           | 0.34  | 76             | TAGLN        | 0.41 |
| 77                    | Contig20562   | 0.34  | 77             | COL6A3       | 0.41 |
| 78                    | C21orf25      | 0.34  | 78             | RAB23        | 0.41 |
| 79                    | Contig54142   | 0.34  | 79             | DEPP         | 0.41 |
| 80                    | SRPUL         | 0.34  | 80             | DCN          | 0.40 |
| 81                    | SERPINH1      | 0.34  | 81             | SRPX         | 0.40 |
| 82                    | AKAP2         | 0.34  | 82             | LOXL1        | 0.40 |
| 83                    | MMP11         | 0.34  | 83             | DPYSL3       | 0.40 |
| 84                    | ADCY7         | 0.34  | 84             | COL5A1       | 0.40 |
| 85                    | Contig55351   | 0.34  | 85             | ETS2         | 0.40 |
| 86                    | GIT1          | 0.34  | 86             | ITGAV        | 0.40 |
| 87                    | SEMA6B        | 0.34  | 87             | CFH          | 0.40 |
| 88                    | CHFR          | 0.34  | 88             | ELK3         | 0.40 |
| 89                    | ATP5G2        | -0.34 | 89             | PELO         | 0.40 |
| 90                    | SART-2        | 0.34  | 90             | LTBP2        | 0.40 |
| 91                    | MAFF          | 0.34  | 91             | NID2         | 0.40 |
| 92                    | COL5A3        | 0.34  | 92             | COL3A1       | 0.40 |
| 93                    | Contig50101   | 0.34  | 93             | GLIPR1       | 0.40 |
| 94                    | COL5A2        | 0.34  | 94             | THBD         | 0.40 |
| 95                    | COL15A1       | 0.34  | 95             | MYL9         | 0.39 |
| 96                    | CD163         | 0.33  | 96             | SMAD7        | 0.39 |
| 97                    | Contig48021   | 0.33  | 97             | SPON1        | 0.39 |
| 98                    | G2            | 0.33  | 98             | SPON2        | 0.39 |
| 99                    | COL6A3        | 0.33  | 99             | GPR124       | 0.39 |
| 100                   | MERTK         | 0.33  | 100            | C1S          | 0.39 |
| 101                   | <b>PDGFRB</b> | 0.33  | 101            | CALCRL       | 0.39 |
| 102                   | ANTXR1        | 0.33  | 102            | AEBP1        | 0.39 |
| 103                   | TNNC1         | -0.33 | 103            | MYH9         | 0.39 |
| 104                   | GNPMB         | 0.33  | 104            | ISLR         | 0.39 |
| 105                   | MYH9          | 0.33  | 105            | COL10A1      | 0.39 |
| 106                   | <b>MIG2</b>   | 0.33  | 106            | F2R          | 0.39 |
| 107                   | SULF1         | 0.33  | 107            | TPST1        | 0.39 |
| 108                   | <b>THBS1</b>  | 0.33  | 108            | LUM          | 0.38 |
| 109                   | WNT2          | 0.33  | 109            | RGS4         | 0.38 |
| 110                   | <b>CALU</b>   | 0.33  | 110            | EFEMP2       | 0.38 |
| 111                   | KIAA1462      | 0.33  | 111            | OLFML2B      | 0.38 |
| 112                   | NOX4          | 0.32  | 112            | FHL1         | 0.38 |
| 113                   | FCGR2A        | 0.32  | 113            | PKD2         | 0.38 |
| 114                   | Contig56169   | 0.32  | 114            | LHFP         | 0.38 |
| 115                   | Contig56099   | 0.32  | 115            | ACVR1        | 0.38 |
| 116                   | Contig52398   | 0.32  | 116            | CAV2         | 0.38 |
| 117                   | IL8           | 0.32  | 117            | CAV1         | 0.38 |
| 118                   | FEZ1          | 0.32  | 118            | C1R          | 0.37 |
| 119                   | COL8A1        | 0.32  | 119            | MMP14        | 0.37 |
| 120                   | ARPC1B        | 0.32  | 120            | PRSS11       | 0.37 |
| 121                   | Contig57270   | 0.32  | 121            | SPOCK        | 0.37 |
| 122                   | CDH13         | 0.32  | 122            | <b>CALD1</b> | 0.37 |
| 123                   | LTBP2         | 0.32  | 123            | FKBP14       | 0.37 |
| 124                   | COL18A1       | 0.32  | 124            | CMKOR1       | 0.37 |
| 125                   | <b>DACT1</b>  | 0.32  | 125            | COL15A1      | 0.37 |
| 126                   | LPAAT-delta   | 0.32  | 126            | SERPINF1     | 0.37 |
| 127                   | GPR118        | 0.32  | 127            | RGC32        | 0.37 |
| 128                   | NDEL1         | 0.32  | 128            | ADAM12       | 0.37 |
| 129                   | Contig60191   | 0.32  | 129            | GPX3         | 0.37 |
| 130                   | Contig45419   | 0.32  | 130            | <b>ATF3</b>  | 0.37 |
| 131                   | Contig57258   | 0.32  | 131            | <b>SGK</b>   | 0.37 |
| 132                   | DYSF          | 0.32  | 132            | TMEM43       | 0.37 |
| 133                   | ST7           | 0.32  | 133            | IGFBP3       | 0.37 |
| 134                   | MAGP2         | 0.32  | 134            | PPIC         | 0.37 |
| 135                   | HOM-TES-103   | 0.32  | 135            | PTRF         | 0.37 |
| 136                   | Contig51797   | 0.32  | 136            | PLN          | 0.37 |
| 137                   | Contig2099    | 0.32  | 137            | CH25H        | 0.37 |
| 138                   | <b>ID3</b>    | 0.32  | 138            | PECAM1       | 0.37 |
| 139                   | THBD          | 0.31  | 139            | ANXA5        | 0.37 |

**Table S2-3. PAI1-correlated genes.**

| van de Vijver dataset |              |       | Miller dataset |              |       |
|-----------------------|--------------|-------|----------------|--------------|-------|
| Rank                  | Symbol       | r     | Rank           | Symbol       | r     |
| 140                   | ODZ4         | 0.31  | 140            | GNG11        | 0.37  |
| 141                   | NY-REN-58    | 0.31  | 141            | CD99         | 0.37  |
| 142                   | BTN2A1       | 0.31  | 142            | ATP10D       | 0.36  |
| 143                   | NDRG1        | 0.31  | 143            | CCL2         | 0.36  |
| 144                   | Contig24326  | 0.31  | 144            | CLP24        | 0.36  |
| 145                   | ZNF537       | 0.31  | 145            | SART2        | 0.36  |
| 146                   | KCNJ15       | 0.31  | 146            | HAS2         | 0.36  |
| 147                   | D2S448       | 0.31  | 147            | POSTN        | 0.36  |
| 148                   | KIAA0709     | 0.31  | 148            | THY1         | 0.36  |
| 149                   | <b>LOX</b>   | 0.31  | 149            | LNK          | 0.36  |
| 150                   | Contig42459  | 0.31  | 150            | BMP1         | 0.36  |
| 151                   | ADAM8        | 0.31  | 151            | HOP          | 0.36  |
| 152                   | ADAMTS2      | 0.31  | 152            | ANGPTL4      | 0.36  |
| 153                   | OVOL2        | -0.31 | 153            | FAH          | 0.36  |
| 154                   | GROS1        | 0.31  | 154            | LMCD1        | 0.36  |
| 155                   | Contig41597  | 0.31  | 155            | <b>TPM4</b>  | 0.36  |
| 156                   | GBE1         | 0.31  | 156            | TCF4         | 0.36  |
| 157                   | P4HA2        | 0.31  | 157            | PROS1        | 0.36  |
| 158                   | CAV2         | 0.31  | 158            | SPARC        | 0.36  |
| 159                   | AKAP13       | 0.31  | 159            | PTPRG        | 0.36  |
| 160                   | THBS2        | 0.31  | 160            | PCOLCE       | 0.36  |
| 161                   | LHFPL2       | 0.31  | 161            | COL1A2       | 0.36  |
| 162                   | SERPINH2     | 0.31  | 162            | CLEC2B       | 0.36  |
| 163                   | TNFAIP3      | 0.31  | 163            | PDGFC        | 0.36  |
| 164                   | RGS2         | 0.31  | 164            | <b>PLAU</b>  | 0.35  |
| 165                   | RGS3         | 0.31  | 165            | DERP13       | 0.35  |
| 166                   | GEM          | 0.31  | 166            | MGC11271     | -0.35 |
| 167                   | Contig57222  | 0.31  | 167            | MFAP5        | 0.35  |
| 168                   | <b>TIEG</b>  | 0.31  | 168            | CLIC4        | 0.35  |
| 169                   | C1S          | 0.31  | 169            | EPB41L2      | 0.35  |
| 170                   | FMO1         | 0.31  | 170            | DPT          | 0.35  |
| 171                   | ARL7         | 0.31  | 171            | FRAG1        | -0.35 |
| 172                   | MCAM         | 0.31  | 172            | AXL          | 0.35  |
| 173                   | RAB6IP1      | 0.31  | 173            | FBLN5        | 0.35  |
| 174                   | SCYA2        | 0.31  | 174            | CYP26B1      | 0.35  |
| 175                   | FLJ20371     | 0.31  | 175            | SERPINE2     | 0.35  |
| 176                   | PIM1         | 0.31  | 176            | FLNA         | 0.35  |
| 177                   | Contig20550  | -0.31 | 177            | PDGFRL       | 0.35  |
| 178                   | OLFML2B      | 0.31  | 178            | YIPF5        | 0.35  |
| 179                   | ADFP         | 0.30  | 179            | <b>CALU</b>  | 0.35  |
| 180                   | HAS1         | 0.30  | 180            | GNPMB        | 0.35  |
| 181                   | HU-K5        | 0.30  | 181            | SSB1         | 0.35  |
| 182                   | C1R          | 0.30  | 182            | NDN          | 0.35  |
| 183                   | SLC18A3      | 0.30  | 183            | <b>PLAUR</b> | 0.35  |
| 184                   | Contig2263   | 0.30  | 184            | MYO1D        | 0.34  |
| 185                   | <b>SGK</b>   | 0.30  | 185            | PPARG        | 0.34  |
| 186                   | SERPINF1     | 0.30  | 186            | SLC39A14     | 0.34  |
| 187                   | Contig2647   | 0.30  | 187            | KLF2         | 0.34  |
| 188                   | Contig49445  | 0.30  | 188            | NR4A3        | 0.34  |
| 189                   | SCYA3        | 0.30  | 189            | NINJ2        | 0.34  |
| 190                   | HLX1         | 0.30  | 190            | HSD17B6      | 0.34  |
| 191                   | <b>NID</b>   | 0.30  | 191            | SMTN         | 0.34  |
| 192                   | Contig6382   | 0.30  | 192            | MFAP2        | 0.34  |
| 193                   | Contig40552  | 0.30  | 193            | TENS1        | 0.34  |
| 194                   | SPP1         | 0.30  | 194            | ELTD1        | 0.34  |
| 195                   | C2orf12      | 0.30  | 195            | COL18A1      | 0.34  |
| 196                   | NS1-BP       | 0.30  | 196            | ACTN1        | 0.34  |
| 197                   | Contig56350  | 0.30  | 197            | CD248        | 0.34  |
| 198                   | STK10        | 0.30  | 198            | MXRA8        | 0.34  |
| 199                   | SCYA4        | 0.30  | 199            | COL1A1       | 0.34  |
| 200                   | Contig44708  | 0.30  | 200            | PGCP         | 0.34  |
| 201                   | Contig27055  | 0.30  | 201            | MCL1         | 0.34  |
| 202                   | PLD1         | 0.30  | 202            | MMP2         | 0.34  |
| 203                   | Contig32213  | 0.30  | 203            | F13A1        | 0.34  |
| 204                   | CCR1         | 0.30  | 204            | SYBL1        | 0.34  |
| 205                   | <b>CSPG2</b> | 0.30  | 205            | WFDC1        | 0.34  |
| 206                   | TLR2         | 0.30  | 206            | SVEP1        | 0.34  |
| 207                   | ZNF20        | -0.30 | 207            | SPRY1        | 0.34  |
| 208                   | MYCBP        | -0.30 | 208            | WISP2        | 0.34  |
| 209                   | <b>TPM4</b>  | 0.30  | 209            | VEGFC        | 0.34  |
| 210                   | Contig43759  | 0.30  | 210            | LDB2         | 0.34  |
| 211                   | Contig753    | -0.30 | 211            | LHFPL2       | 0.34  |
| 212                   | Contig33750  | 0.30  | 212            | TGFBFR2      | 0.34  |
| 213                   | AEBP1        | 0.30  | 213            | GILP         | 0.34  |

Table S2-4. PAI1-correlated genes.

| van de Vijver dataset |               |       | Miller dataset |              |       |
|-----------------------|---------------|-------|----------------|--------------|-------|
| Rank                  | Symbol        | r     | Rank           | Symbol       | r     |
| 214                   | SLC21A9       | 0.30  | 214            | MMP3         | 0.34  |
| 215                   | SLC39A13      | 0.30  | 215            | DDR2         | 0.34  |
| 216                   | KIAA0350      | 0.30  | 216            | GLT8D2       | 0.34  |
| 217                   | EPB41L2       | 0.30  | 217            | OLFML1       | 0.34  |
| 218                   | <b>DUSP1</b>  | 0.30  | 218            | ENPEP        | 0.34  |
| 219                   | PRRG2         | -0.30 | 219            | OFD1         | -0.34 |
| 220                   | Contig65401   | 0.30  | 220            | MAFF         | 0.33  |
| 221                   | SLC36A1       | 0.30  | 221            | PDLIM2       | 0.33  |
| 222                   | FLJ10157      | 0.30  | 222            | ANXA1        | 0.33  |
| 223                   | CEP135        | 0.30  | 223            | TGFB111      | 0.33  |
| 224                   | DAB2          | 0.29  | 224            | NRP1         | 0.33  |
| 225                   | RBMS1         | 0.29  | 225            | PRRG1        | 0.33  |
| 226                   | MMP2          | 0.29  | 226            | GUCY1B3      | 0.33  |
| 227                   | LOC51695      | 0.29  | 227            | EDNRA        | 0.33  |
| 228                   | TMEM2         | 0.29  | 228            | ITGA5        | 0.33  |
| 229                   | Contig56023   | 0.29  | 229            | FAS          | 0.33  |
| 230                   | KIAA1324      | -0.29 | 230            | KDELCL1      | 0.33  |
| 231                   | FLJ11259      | 0.29  | 231            | SPARCL1      | 0.33  |
| 232                   | LAMC1         | 0.29  | 232            | MGC14376     | 0.33  |
| 233                   | CRBN          | -0.29 | 233            | HEG1         | 0.33  |
| 234                   | Contig14544   | 0.29  | 234            | AES          | -0.33 |
| 235                   | IBSP          | 0.29  | 235            | SCAP2        | 0.33  |
| 236                   | MTHFD1L       | 0.29  | 236            | GSN          | 0.33  |
| 237                   | EPHA2         | 0.29  | 237            | CSRP2        | 0.33  |
| 238                   | HSPC049       | 0.29  | 238            | SELE         | 0.33  |
| 239                   | ERBB3         | -0.29 | 239            | SPHK1        | 0.33  |
| 240                   | GATA3         | -0.29 | 240            | TNS1         | 0.33  |
| 241                   | Contig4574    | -0.29 | 241            | COL8A2       | 0.33  |
| 242                   | TIMP1         | 0.29  | 242            | <b>THBS1</b> | 0.33  |
| 243                   | CBR1          | 0.29  | 243            | PLXNC1       | 0.32  |
| 244                   | Contig48167   | 0.29  | 244            | LY96         | 0.32  |
| 245                   | QDPR          | -0.28 | 245            | DNAJB4       | 0.32  |
| 246                   | Contig4825    | 0.28  | 246            | HTR2B        | 0.32  |
| 247                   | Contig38580   | -0.28 | 247            | SNF1LK       | 0.32  |
| 248                   | Contig60194   | 0.28  | 248            | PMP22        | 0.32  |
| 249                   | SMAD7         | 0.28  | 249            | SULT1A2      | -0.32 |
| 250                   | <b>EGR2</b>   | 0.28  | 250            | ASPN         | 0.32  |
| 251                   | BASP1         | 0.28  | 251            | FLJ20701     | 0.32  |
| 252                   | MSN           | 0.28  | 252            | PSCD1        | 0.32  |
| 253                   | HCK           | 0.28  | 253            | EMP3         | 0.32  |
| 254                   | Contig52095   | 0.28  | 254            | CTSL         | 0.32  |
| 255                   | SCHIP-1       | 0.28  | 255            | NAP1L3       | 0.32  |
| 256                   | Contig51163   | 0.28  | 256            | CDH5         | 0.32  |
| 257                   | Contig35035   | 0.28  | 257            | IBRDC3       | 0.32  |
| 258                   | ADAM19        | 0.28  | 258            | COL6A1       | 0.32  |
| 259                   | TCF8          | 0.28  | 259            | WBSCR20C     | -0.32 |
| 260                   | Contig56501   | 0.28  | 260            | GALNACT-2    | 0.32  |
| 261                   | JUNB          | 0.28  | 261            | PXDN         | 0.32  |
| 262                   | MYB           | -0.28 | 262            | TMEM22       | 0.32  |
| 263                   | KIAA0477      | 0.28  | 263            | DSCR1L1      | 0.32  |
| 264                   | CXCR4         | 0.28  | 264            | MMP13        | 0.32  |
| 265                   | <b>IGFBP7</b> | 0.28  | 265            | TRAM2        | 0.32  |
| 266                   | FACL4         | 0.28  | 266            | FABP5        | 0.31  |
| 267                   | SLA           | 0.28  | 267            | LMNA         | 0.31  |
| 268                   | ZNF14         | -0.28 | 268            | MMP11        | 0.31  |
| 269                   | Contig49330   | 0.28  | 269            | NRBF2        | 0.31  |
| 270                   | <b>CALD1</b>  | 0.28  | 270            | SYNPO        | 0.31  |
| 271                   | Contig41887   | -0.28 | 271            | IL15RA       | 0.31  |
| 272                   | SRF           | 0.28  | 272            | EMCN         | 0.31  |

Table S2-5. PAI1-correlated genes.

| Miller dataset |             |       |
|----------------|-------------|-------|
| Rank           | Symbol      | r     |
| 273            | GULP1       | 0.31  |
| 274            | MXRA5       | 0.31  |
| 275            | S100A10     | 0.31  |
| 276            | RAI14       | 0.31  |
| 277            | FKBP9       | 0.31  |
| 278            | PTGS2       | 0.31  |
| 279            | PDPN        | 0.31  |
| 280            | GADD45A     | 0.31  |
| 281            | NR3C1       | 0.31  |
| 282            | RGS2        | 0.31  |
| 283            | FOS         | 0.31  |
| 284            | OLFML3      | 0.31  |
| 285            | MFAP4       | 0.31  |
| 286            | EPAS1       | 0.31  |
| 287            | PDCD6       | -0.31 |
| 288            | RAB32       | 0.31  |
| 289            | KCTD12      | 0.31  |
| 290            | MAN1A1      | 0.31  |
| 291            | TNFRSF1A    | 0.31  |
| 292            | PPAP2A      | 0.31  |
| 293            | HCG8        | -0.31 |
| 294            | CCHCR1      | -0.30 |
| 295            | FLJ14054    | 0.30  |
| 296            | EDG1        | 0.30  |
| 297            | TMEM49      | 0.30  |
| 298            | ADFP        | 0.30  |
| 299            | RARRES2     | 0.30  |
| 300            | NBL1        | 0.30  |
| 301            | TNS         | 0.30  |
| 302            | CHN1        | 0.30  |
| 303            | CORO1C      | 0.30  |
| 304            | PTGIS       | 0.30  |
| 305            | WBP5        | 0.30  |
| 306            | FOSB        | 0.30  |
| 307            | PTPRM       | 0.30  |
| 308            | MMRN2       | 0.30  |
| 309            | RIN2        | 0.30  |
| 310            | PARP6       | -0.30 |
| 311            | KLF9        | 0.30  |
| 312            | PALM2-AKAP2 | 0.30  |
| 313            | LTBP1       | 0.30  |
| 314            | PP1201      | 0.30  |
| 315            | PRG1        | 0.30  |
| 316            | FLJ10357    | 0.30  |
| 317            | SULT1A1     | -0.30 |
| 318            | PALLD       | 0.30  |
| 319            | COPZ2       | 0.30  |
| 320            | BACE1       | 0.30  |
| 321            | C4ST/CHST11 | 0.30  |
| 322            | LBH         | 0.30  |
| 323            | FLJ12700    | -0.30 |
| 324            | TIE1        | 0.30  |
| 325            | CYP1B1      | 0.30  |
| 326            | KLF4        | 0.29  |
| 327            | SOCS5       | 0.29  |
| 328            | JUN         | 0.29  |
| 329            | PICALM      | 0.29  |
| 330            | MAP4K4      | 0.29  |
| 331            | ADAMTS2     | 0.29  |
