# Supplementary material
Source: PubMed Central journal article supplement (PMC2731792)
Supplement: NIHMS75387-supplement-sup__4.pdf [file NIHMS75387-supplement-sup__4.pdf]

**Table S3. PAI1 4G/5G distributions in independent breast cancer studies.**

| Genotype                                            | Cases       | Controls   | OR (95%CI)       | <i>p</i> -value |
|-----------------------------------------------------|-------------|------------|------------------|-----------------|
| <b>Blasiak and Smolarz (42)</b>                     |             |            |                  |                 |
| 5G5G                                                | 29 (29.0)   | 37 (34.9)  | 1.00 (reference) | } 0.18          |
| 4G5G                                                | 40 (40.0)   | 48 (45.3)  | 1.06 (0.56-2.02) |                 |
| 4G4G                                                | 31 (31.0)   | 21 (19.8)  | 1.88 (0.90-3.94) |                 |
| 4G carriers                                         |             |            | 1.31 (0.73-2.35) | 0.36            |
| 4G4G vs 5G carriers                                 |             |            | 1.80 (0.96-3.39) | 0.065           |
| <b>Castello <i>et al.</i> (41) †</b>                |             |            |                  |                 |
| 5G5G                                                | 14 (13.4)   | 30 (28.9)  | 1.00 (reference) | } 0.025         |
| 4G5G                                                | 66 (63.5)   | 54 (51.9)  | 2.62 (1.26-5.43) |                 |
| 4G4G                                                | 24 (23.1)   | 20 (19.2)  | 2.57 (1.08-6.13) |                 |
| 4G carriers                                         |             |            | 2.56 (1.27-5.13) | 0.007           |
| 4G4G vs 5G carriers                                 |             |            | 0.93 (0.39-2.19) | 0.86            |
| <b>Castello <i>et al.</i> + Blasiak and Smolarz</b> |             |            |                  |                 |
| 5G5G                                                | 43 (21.1)   | 67 (31.9)  | 1.00 (reference) | } 0.026         |
| 4G5G                                                | 106 (52.0)  | 102 (48.6) | 1.62 (1.01-2.59) |                 |
| 4G4G                                                | 55 (26.9)   | 41 (19.5)  | 2.09 (1.20-3.65) |                 |
| 4G carriers                                         |             |            | 1.75 (1.12-2.72) | 0.013           |
| 4G4G vs 5G carriers                                 |             |            | 1.52 (0.96-2.40) | 0.073           |
| <b>Overall meta-analysis, including ABC-EPIC</b>    |             |            |                  |                 |
| 5G5G                                                | 563 (20.5)  | 453 (22.2) | 1.00 (reference) | } 0.24          |
| 4G5G                                                | 1335 (48.7) | 998 (48.9) | 1.08 (0.93-1.25) |                 |
| 4G4G                                                | 845 (30.8)  | 591 (28.9) | 1.15 (0.98-1.35) |                 |
| 4G carriers                                         |             |            | 1.10 (0.96-1.27) | 0.17            |
| 4G4G vs 5G carriers                                 |             |            | 1.09 (0.96-1.24) | 0.16            |

† Control data were provided by Dr. Amparrio Estelles (personal communication).
